# Supplementary material for: Biomimetic NIR-II fluorescent proteins created from chemogenic protein-seeking dyes for multicolor deep-tissue bioimaging
Source: PubMed Central journal article supplement (PMC10987503; doi:10.1038/s41467-024-47063-4), 2024-04-02
Supplement: 41467_2024_47063_MOESM4_ESM.pdf [file 41467_2024_47063_MOESM4_ESM.pdf]

Supplementary Movie 1:

Molecular dynamics simulation (MD) optimization for the screened covalent-bond conformation of HSA@CO-1080 using Desmond module.
